# Supplementary material for: Fluorescence-enhanced light-blue bilayer radiative cooling coatings
Source: Royal Society of Chemistry journal article supplement (doi:10.1039/d4ta03045a), 2024-01-01
Supplement: d4ta03045a1.pdf [file d4ta03045a1.pdf]

## Supplementary Information

### Fluorescence-enhanced light-blue bilayer radiative cooling coatings

Xue Ma,<sup>a</sup> Yang Fu,<sup>a</sup> Ning Yang,<sup>b</sup> Xin Hu<sup>c</sup>, Jian-Guo Dai,<sup>b</sup> Bin Fei<sup>c</sup>, and Dangyuan Lei<sup>\*a</sup>

<sup>a</sup> Department of Materials Science and Engineering, Centre for Functional Photonics, and Hong Kong Branch of National Precious Metals Material Engineering Research Centre, City University of Hong Kong, 83 Tat Chee Avenue, Kowloon, Hong Kong, 999077, China.

<sup>b</sup> Department of Architecture and Civil Engineering, City University of Hong Kong, Kowloon, Hong Kong, 999077, China.

<sup>c</sup> School of Fashion and Textiles, The Hong Kong Polytechnic University, Hung Hom, Kowloon, Hong Kong, 999077, China.

E-mail: [dangylei@cityu.edu.hk](mailto:dangylei@cityu.edu.hk)

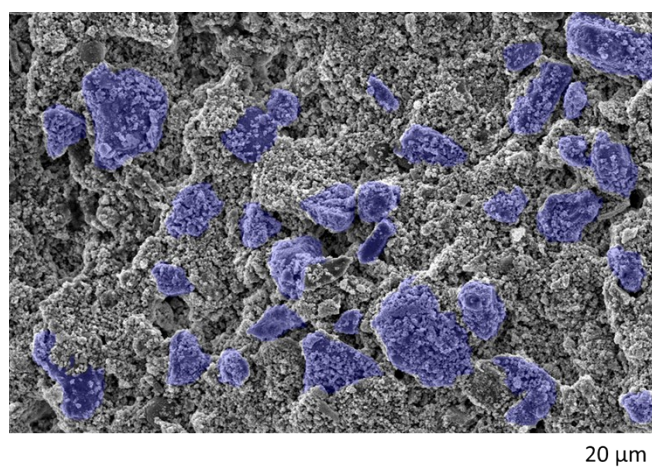

Figure S1 SEM image of the top layer in the light-blue coating.

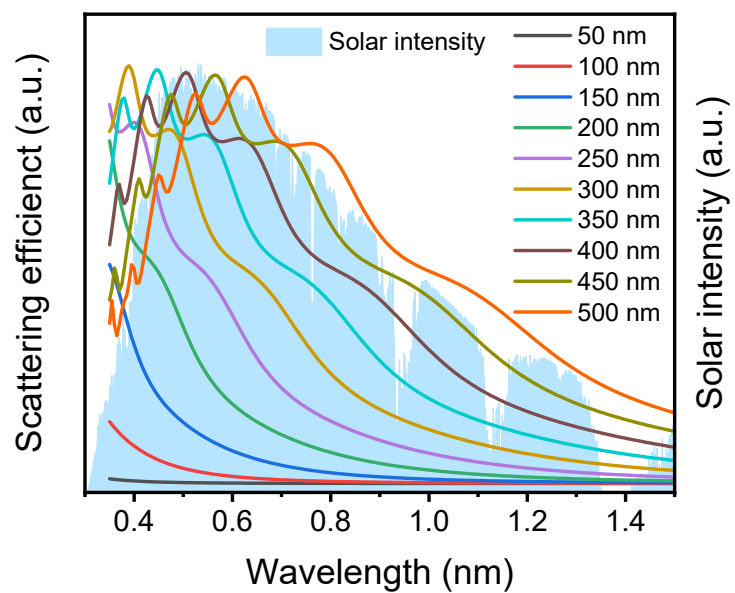

Figure S2 Stimulated scattering spectra of ZrO<sub>2</sub> nanoparticles with varied diameters and solar intensity spectrum.

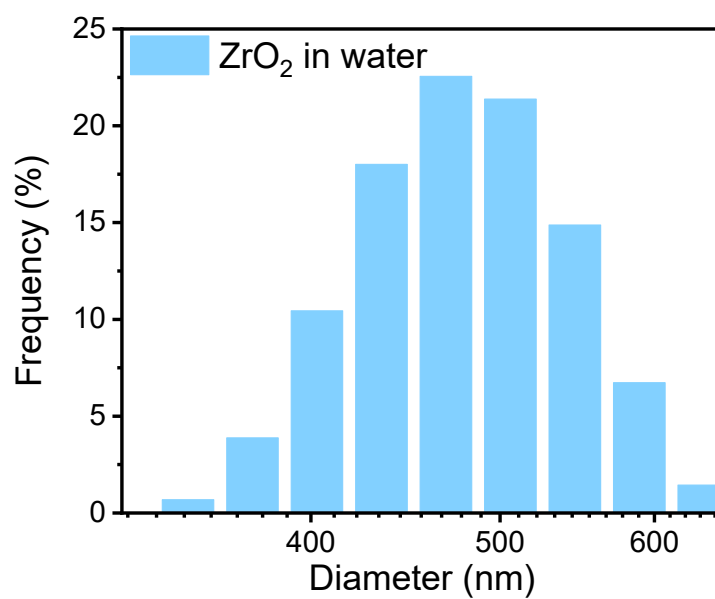

Figure S3 Size distribution of ZrO<sub>2</sub> nanoparticles monodispersed in water.

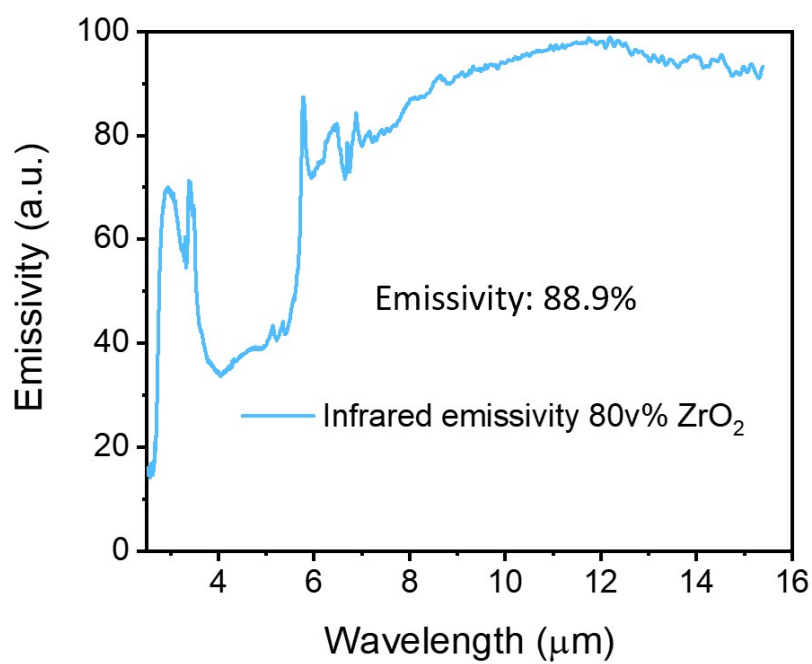

Figure S4 Infrared emissivity of the white coating with ZrO<sub>2</sub> volume fraction of 80v%.

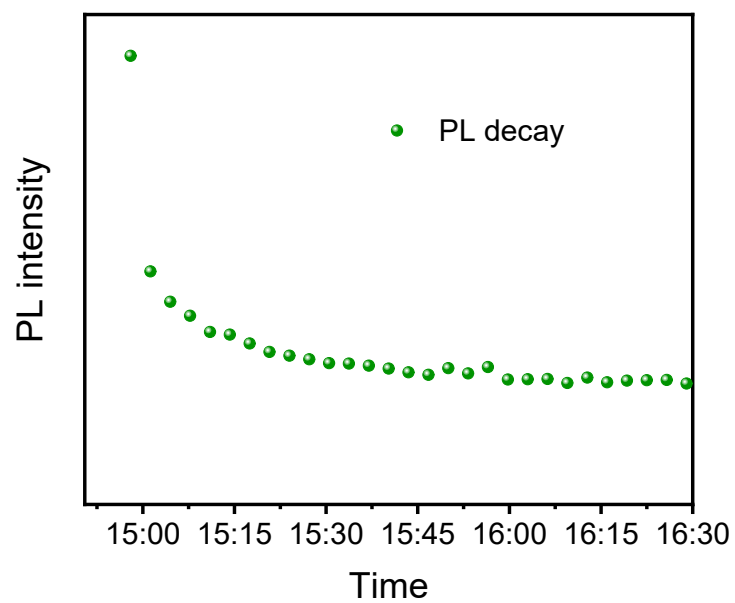

Figure S5 The photoluminescent lifetime of the  $\text{SrO} \cdot \text{Al}_2\text{O}_3 : \text{Eu}$  phosphor.

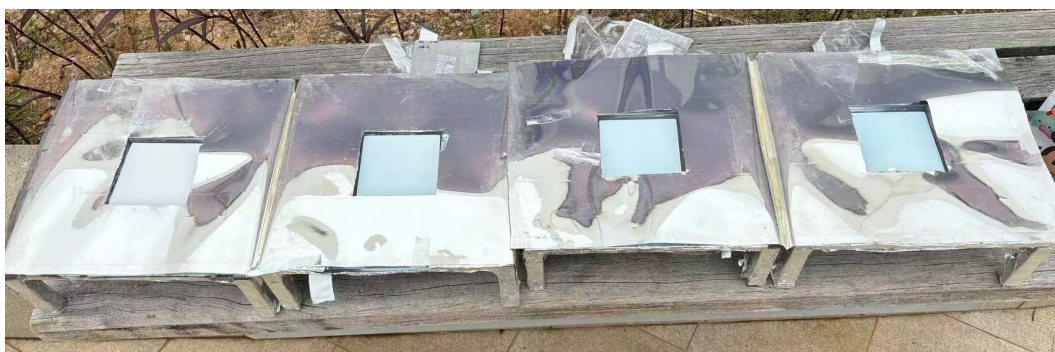

Figure S6 Photographs of the apparatus for outdoor tests of radiative cooling performance.

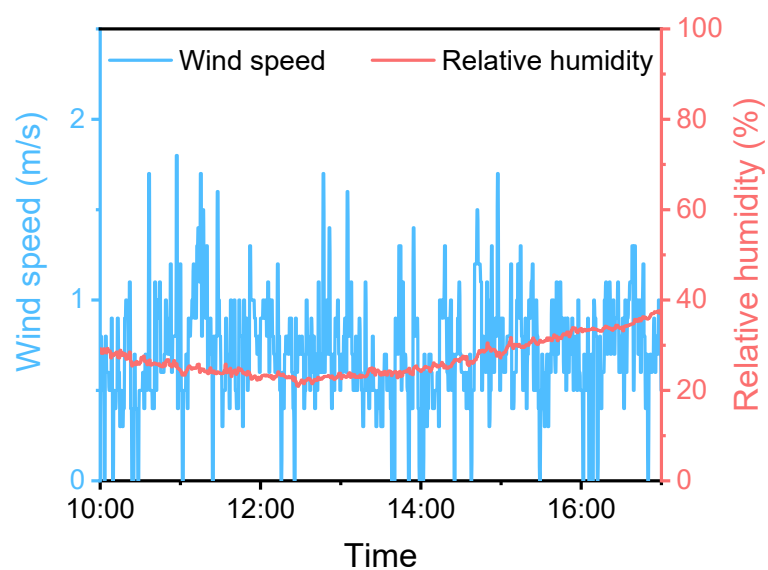

Figure S7 Solar intensity and humidity for the field tests in Figure 4a.

Table S1 Reflectance of white bottom and unexcited bilayer blue coatings.

| Sample                                  | UV    | Vis   | NIR   | Total |
|-----------------------------------------|-------|-------|-------|-------|
| White ZrO <sub>2</sub> bottom           | 96.0% | 98.8% | 98.6% | 98.7% |
| 5v% phosphor and 75v% ZrO <sub>2</sub>  | 92.5% | 91.7% | 97.5% | 94.1% |
| 10v% phosphor and 70v% ZrO <sub>2</sub> | 85.7% | 86.5% | 96.9% | 91.5% |
| 15v% phosphor and 65v% ZrO <sub>2</sub> | 77.8% | 80.4% | 96.2% | 88.0% |
